# Supplementary material for: ASGR1 deficiency diverts lipids toward adipose tissue but results in liver damage during obesity
Source: PubMed Central journal article supplement (PMC10823681; doi:10.1186/s12933-023-02099-6), 2024-01-28

# ASGR1 deficiency directs lipids towards adipose tissue in obesity.

Monika Svecla<sup>1</sup>, Lorenzo Da Dalt<sup>1</sup>, Annalisa Moregola<sup>1</sup>, Jasmine Nour<sup>1</sup>, Andrea Baragetti<sup>1</sup>, Patrizia Uboldi<sup>1</sup>, Elena Donetti<sup>2</sup>, Lorenzo Arnaboldi<sup>1</sup>, Giangiacomo Beretta<sup>3</sup>, Fabrizia Bonacina<sup>1</sup>, Giuseppe Danilo Norata<sup>1</sup>

<sup>1</sup>Department of Pharmacological and Biomolecular Sciences, Università degli Studi di Milano, Milan, Italy.

<sup>2</sup>Department of Biomedical Science for Health, Università degli Studi di Milano, Italy. <sup>3</sup>Department of Environmental Science and Policy, Università degli Studi di Milano, Milan, Italy.

**Corresponding author:**

Giuseppe Danilo Norata, Professor of Pharmacology, University of Milan, Via Balzaretti 9, 20133 Milan, Italy. E-mail: danilo.norata@unimi.it

## Supplementary data

### Supplemental content (this file):

**Supplementary Figure S1** – Weight and energy metabolism.

**Supplementary Figure S2** – Circulating glucose and lipid homeostasis.

**Supplementary Figure S3** – Visceral adipose tissue metabolism.

**Supplementary Figure S4** – Flow cytometry gating strategy for the analysis of innate immune cells.

**Supplementary Figure S5** – Flow cytometry gating strategy for the analysis of adaptive immune cells.

**Supplementary Figure S6** – VAT and liver immunophenotyping.

**Supplementary Figure S7** – Liver lipids and metabolism.

### Supplemental content (excel file):

**Supplementary Table S1** – List of fluorescent-conjugated antibodies

**Supplementary Table S2** – The LFQ-abundance of visceral adipose tissue proteome

**Supplementary Table S3** – The LFQ-abundance of liver proteome

**Supplementary Table S4** – The sequences of the mouse qPCR primers

# Supplementary Figure S1

● WT  
● ASGR1<sup>-/-</sup>

## A. Total body weight

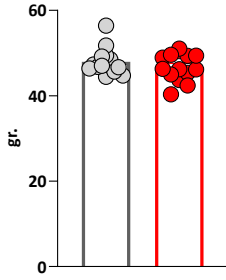

## B. Spleen

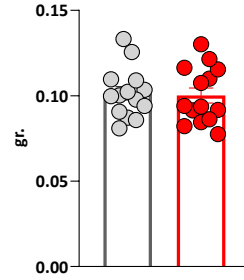

## C. mLN

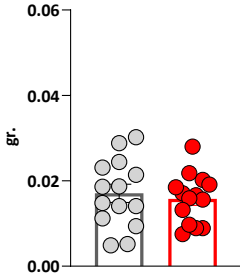

# Supplementary Figure S2

● WT  
● ASGR1<sup>-/-</sup>

### A. Basal glucose after 14h of fasting

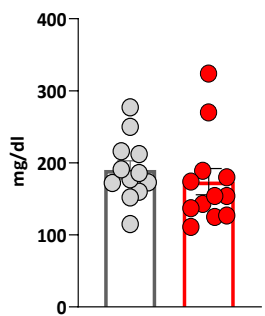

### B. Basal glucose after 4h of fasting

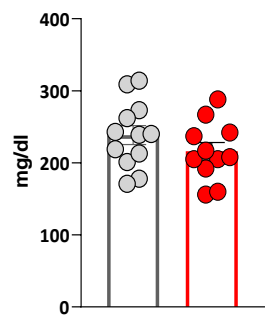

### C. Oral fat load

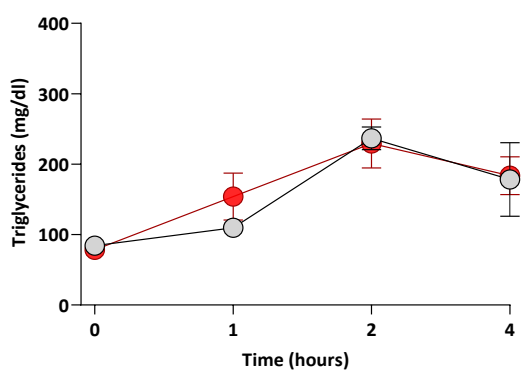

### D. VLDL secretion

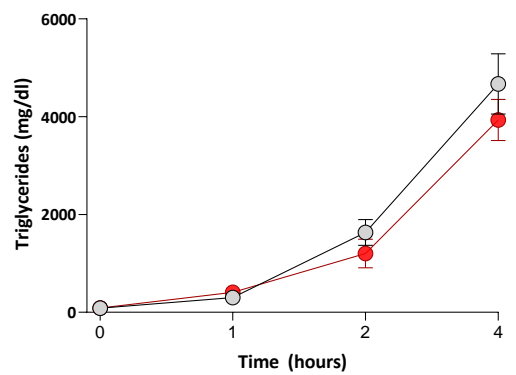

### E. Plasma AST

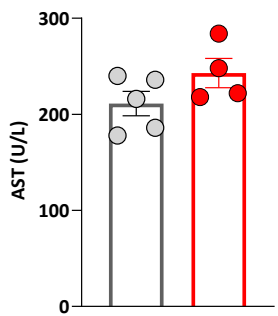

### F. Plasma ALT

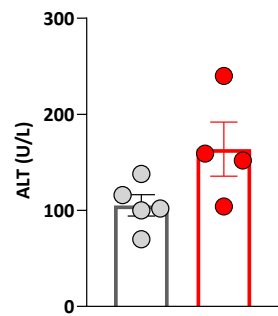

# Supplementary Figure S3

**A.**

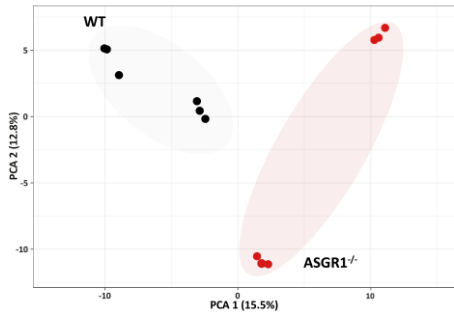

**B.**

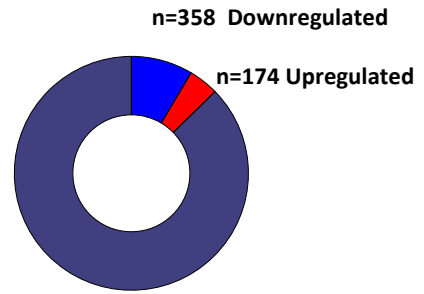

**C.**

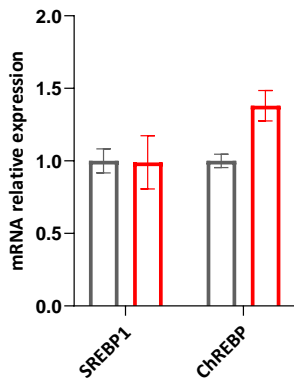

**D.**

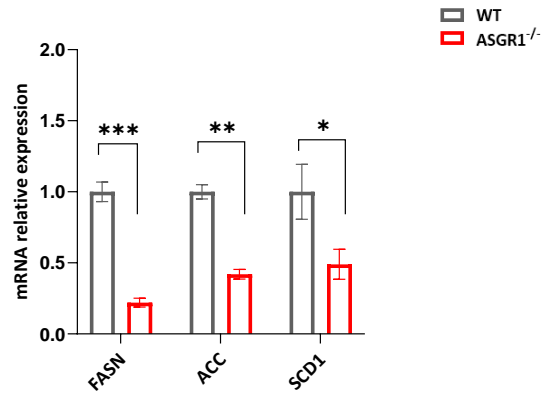

**E.**

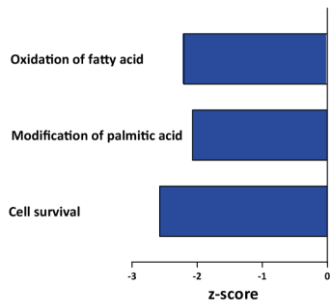

**F.**

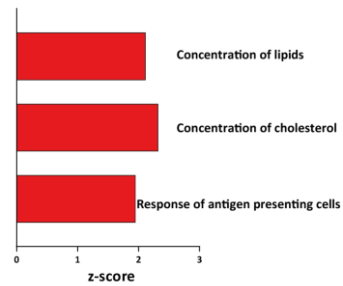

**G.**

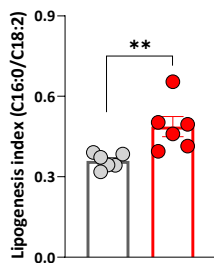

**H.**

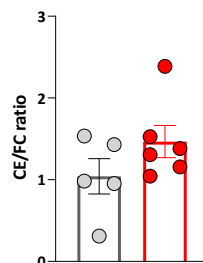

**I.**

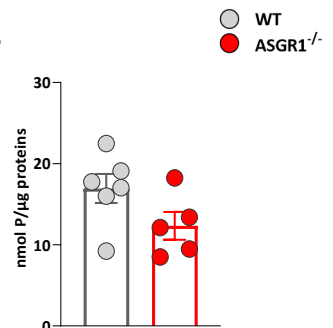

## Supplementary Figure S3 – Visceral adipose tissue metabolism

# Supplementary Figure S4

A.

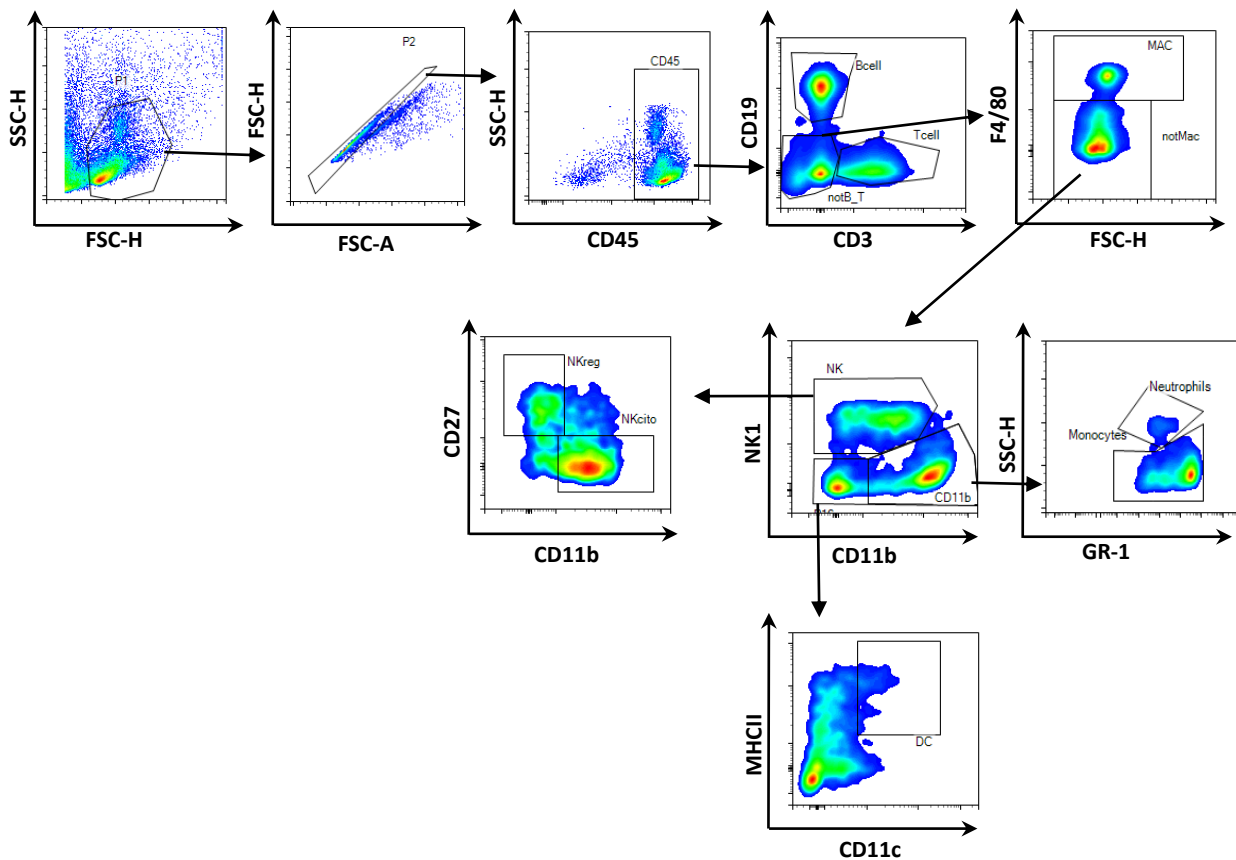

Supplementary Figure S4 –Flow cytometry gating strategy for the analysis of innate immune cells.

# Supplementary Figure S5

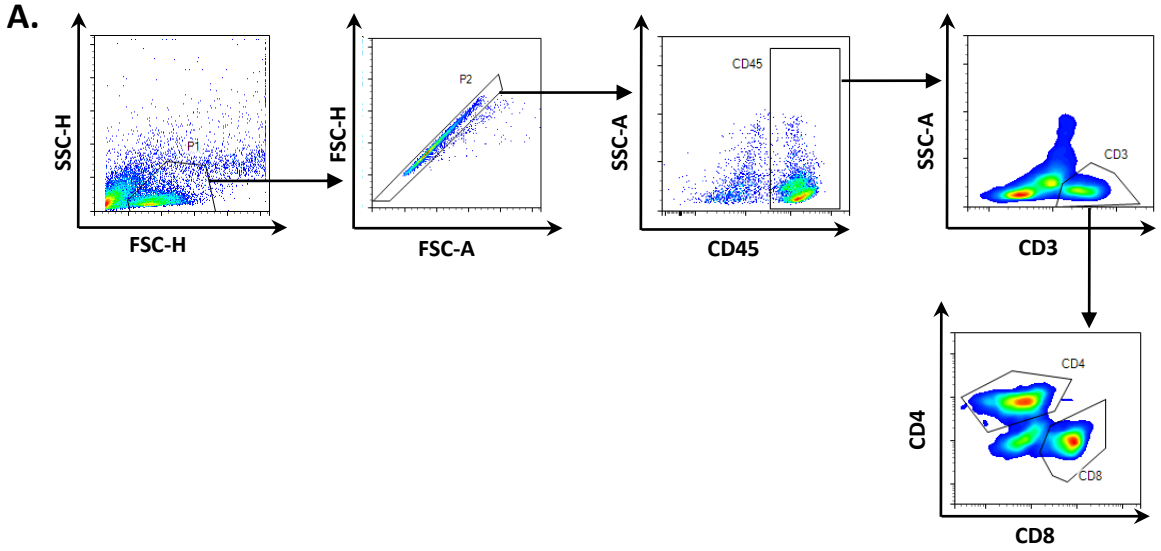

**Supplementary Figure S5 – Flow cytometry gating strategy for the analysis of adaptive immune cells.**

### VAT immunophenotyping

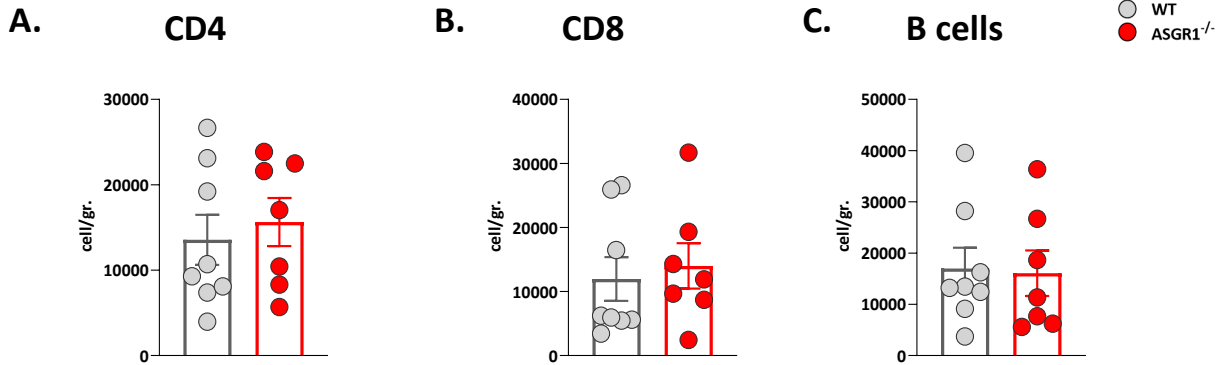

### Liver immunophenotyping

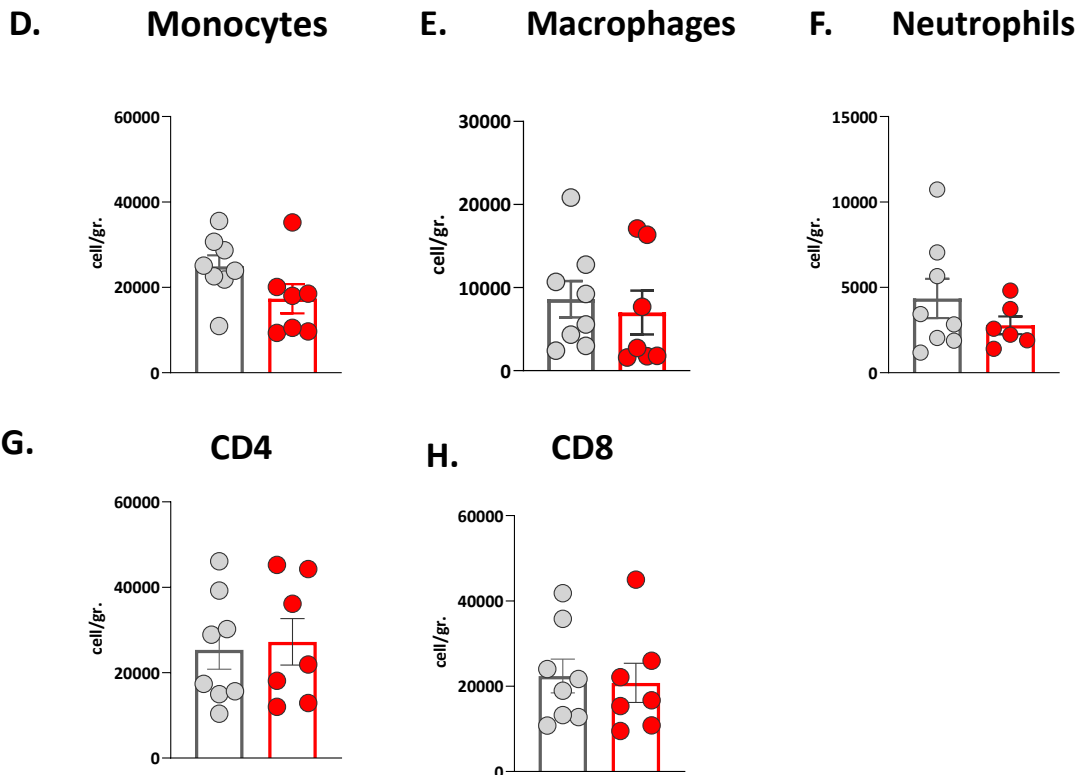



# Supplementary Figure S7

## A. Liver cholesterol

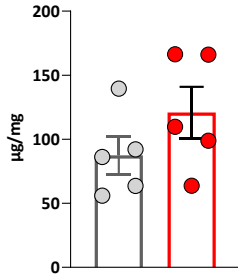

## B. Liver triglycerides

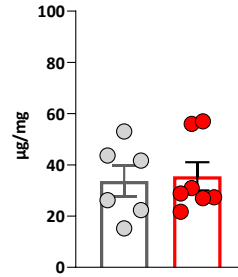

○ WT  
● ASGR1<sup>-/-</sup>

## C.

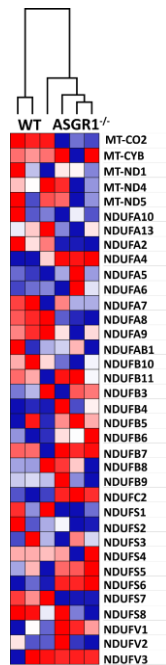

## D.

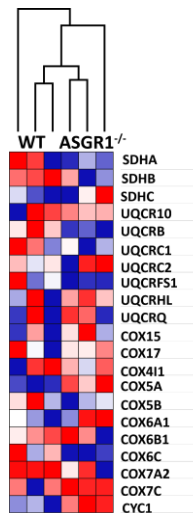

## E.

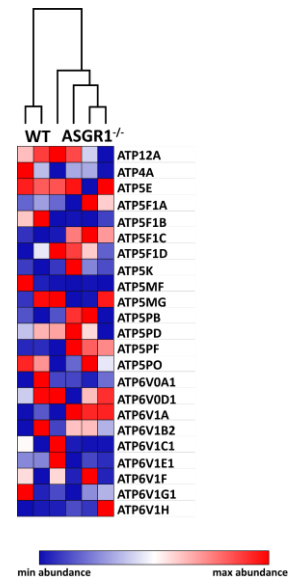

Supplement: 12933_2023_2099_MOESM1_ESM.pdf [file 12933_2023_2099_MOESM1_ESM.pdf]
